# Supplementary material
Source: PubMed Central journal article supplement (PMC3987901)
Supplement: NIHMS514379-supplement-supplement_1.pdf [file NIHMS514379-supplement-supplement_1.pdf]

- B. Alkaline phosphatase staining of reprogrammable cells grown in the absence or presence of doxycycline. Doxycycline was withdrawn at day 21, and colonies were stained and counted at day 30.
- C. Morphology and expression of OCT4 and Tra-1-81 in doxycycline-independent secondary hiPS cells.
- D. Microarray analysis of gene expression between BJ fibroblasts, HUES8 hES cells, primary fibroblast-derived hiPS cells, and a resulting secondary hiPS clone. Shown are genes with >2-fold expression value between BJ fibroblasts and HUES8 hES cells.
- E. *In vitro* differentiation of secondary hiPS cells into lineages from all three germ layers. Immunostaining for i) Tuj1, ii) cardiac troponin T, and iii) alpha-fetoprotein.
- F. Temporal requirement of factor expression in hiPS-derived fibroblast-like cells.  $10^4$  cells were plated per time-point and doxycycline was withdrawn daily from days 4 through 19. The number of hES-like colonies that expressed Tra-1-81 were counted at day 25.

## Supplementary Data

### Supplementary Figure 1: Molecular characterization of hiPS cells.

- A. Quantitative RT-PCR analysis for total, endogenous, and viral gene expression of the reprogramming factors. WA09 hES cells, uninfected keratinocytes (K0) and BJ fibroblasts, and 5-factor-infected BJ fibroblasts (3 days +dox) served as controls. Values were standardized to GAPDH, then normalized to WA09 hESC (total and endogenous) or infected BJs (viral).
- B. Bisulfite sequencing of the NANOG and the OCT4 promoter regions in BJ fibroblasts, BJ fibroblast-derived hiPS, and WA09 hES cells. Promoter regions containing differentially methylated CpGs are shown. Open circles represent unmethylated CpGs; closed circles denote methylated CpGs.
- C. Temporal requirement of factor expression in keratinocytes. Cells infected with five factors were seeded at  $7.5 \times 10^4$  cells per time point and doxycycline was withdrawn

every four days from days 6 through 18. The number of hES-like colonies was counted at day 30. All colonies could be expanded in the absence of doxycycline.

**Supplementary Figure 2: Characterization of hiPS-derived fibroblast-like cells.**

- A. Quantitative RT-PCR analysis of reprogramming factor and pluripotency gene expression in hiPS-derived fibroblasts, WA09 hES cells, and BJ fibroblasts. Values were standardized to GAPDH.
- B. Quantitative RT-PCR analysis for viral transgene reactivation in hiPS-derived fibroblast-like cells from four BJ-hiPS clones. Cells were analyzed two days after doxycycline administration. Clones #5 and #8 were generated with four factors; clones #11 and #12 with five factors. Values were standardized to GAPDH, then calculated as the ratio of expression between +/- doxycycline.

**Supplementary Figure 3: Visual tracking of hiPS colony formation.** hiPS-derived fibroblast-like cells were induced to form secondary hiPS cells, and individual colonies were tracked during the reprogramming process. Doxycycline was withdrawn at various time points.

- A. Representative colony that failed to reprogram.
- B. Representative colony that underwent successful reprogramming.
- C. Representative colonies that gave rise to a hiPS clone; two adjacent colonies were tracked. By day 15, these colonies had regressed and an hES-like colony began to form between them (arrows), which continued to develop as hiPS cells.

**Supplementary Table 1: Summary of expanded hiPS cell lines.**

**Supplementary Table 2: Primers used in this study.**

Figure 1

Figure 1.

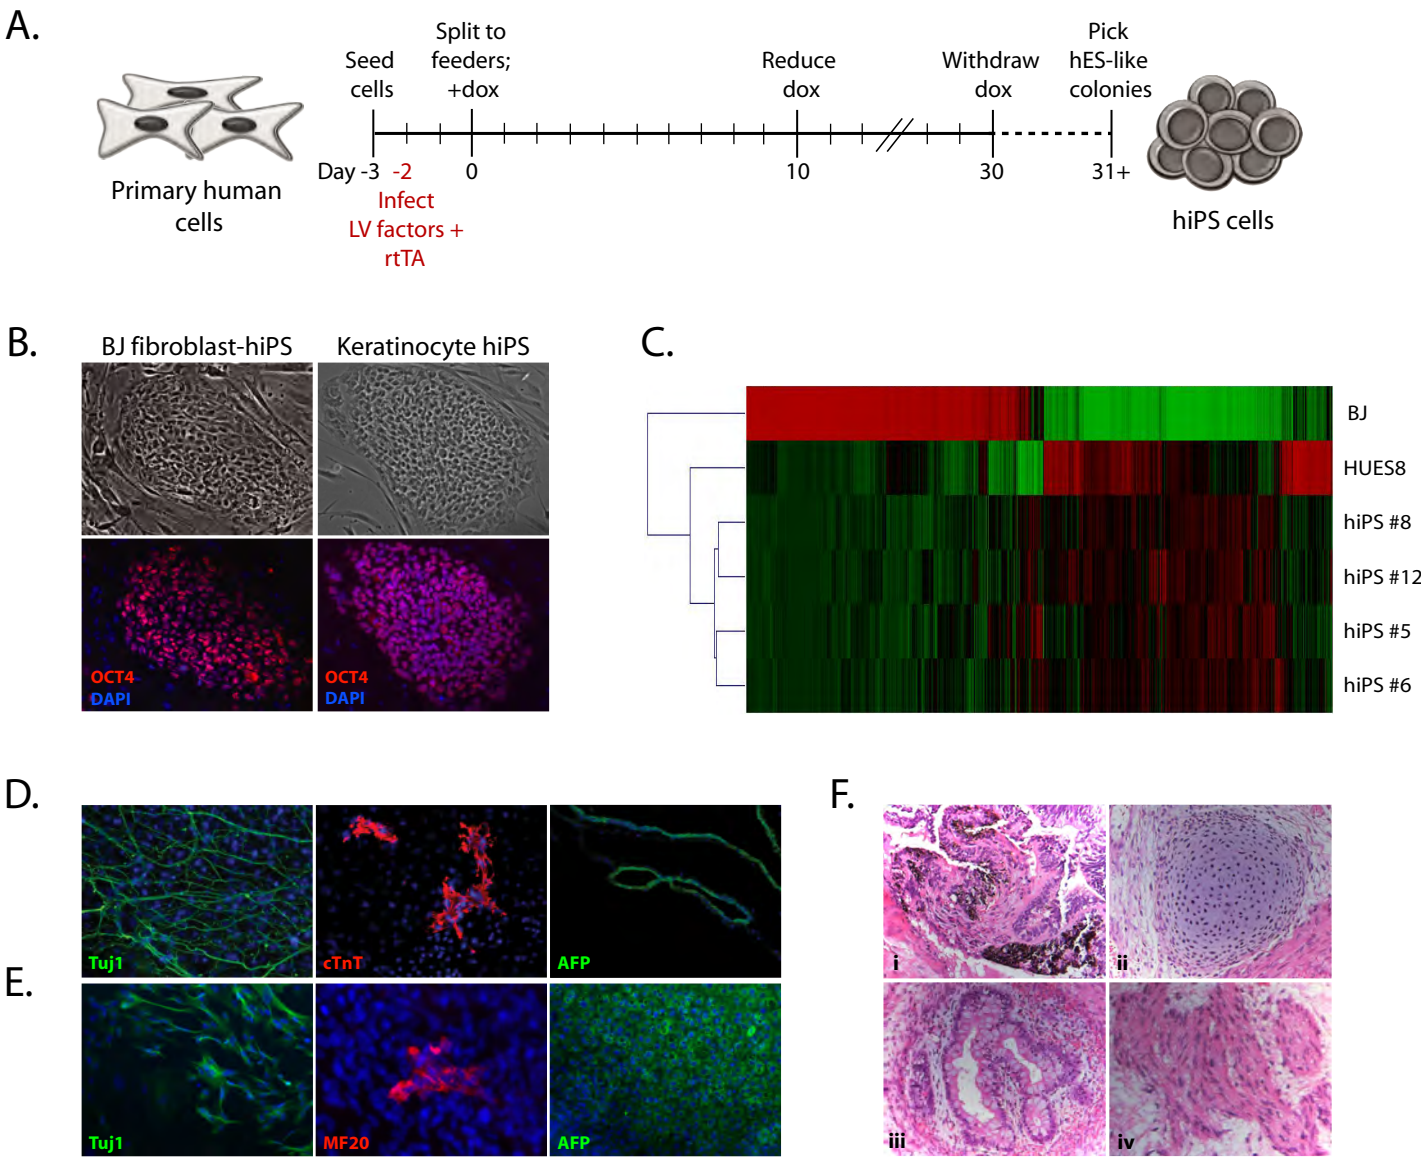

Figure 2

Figure 2.

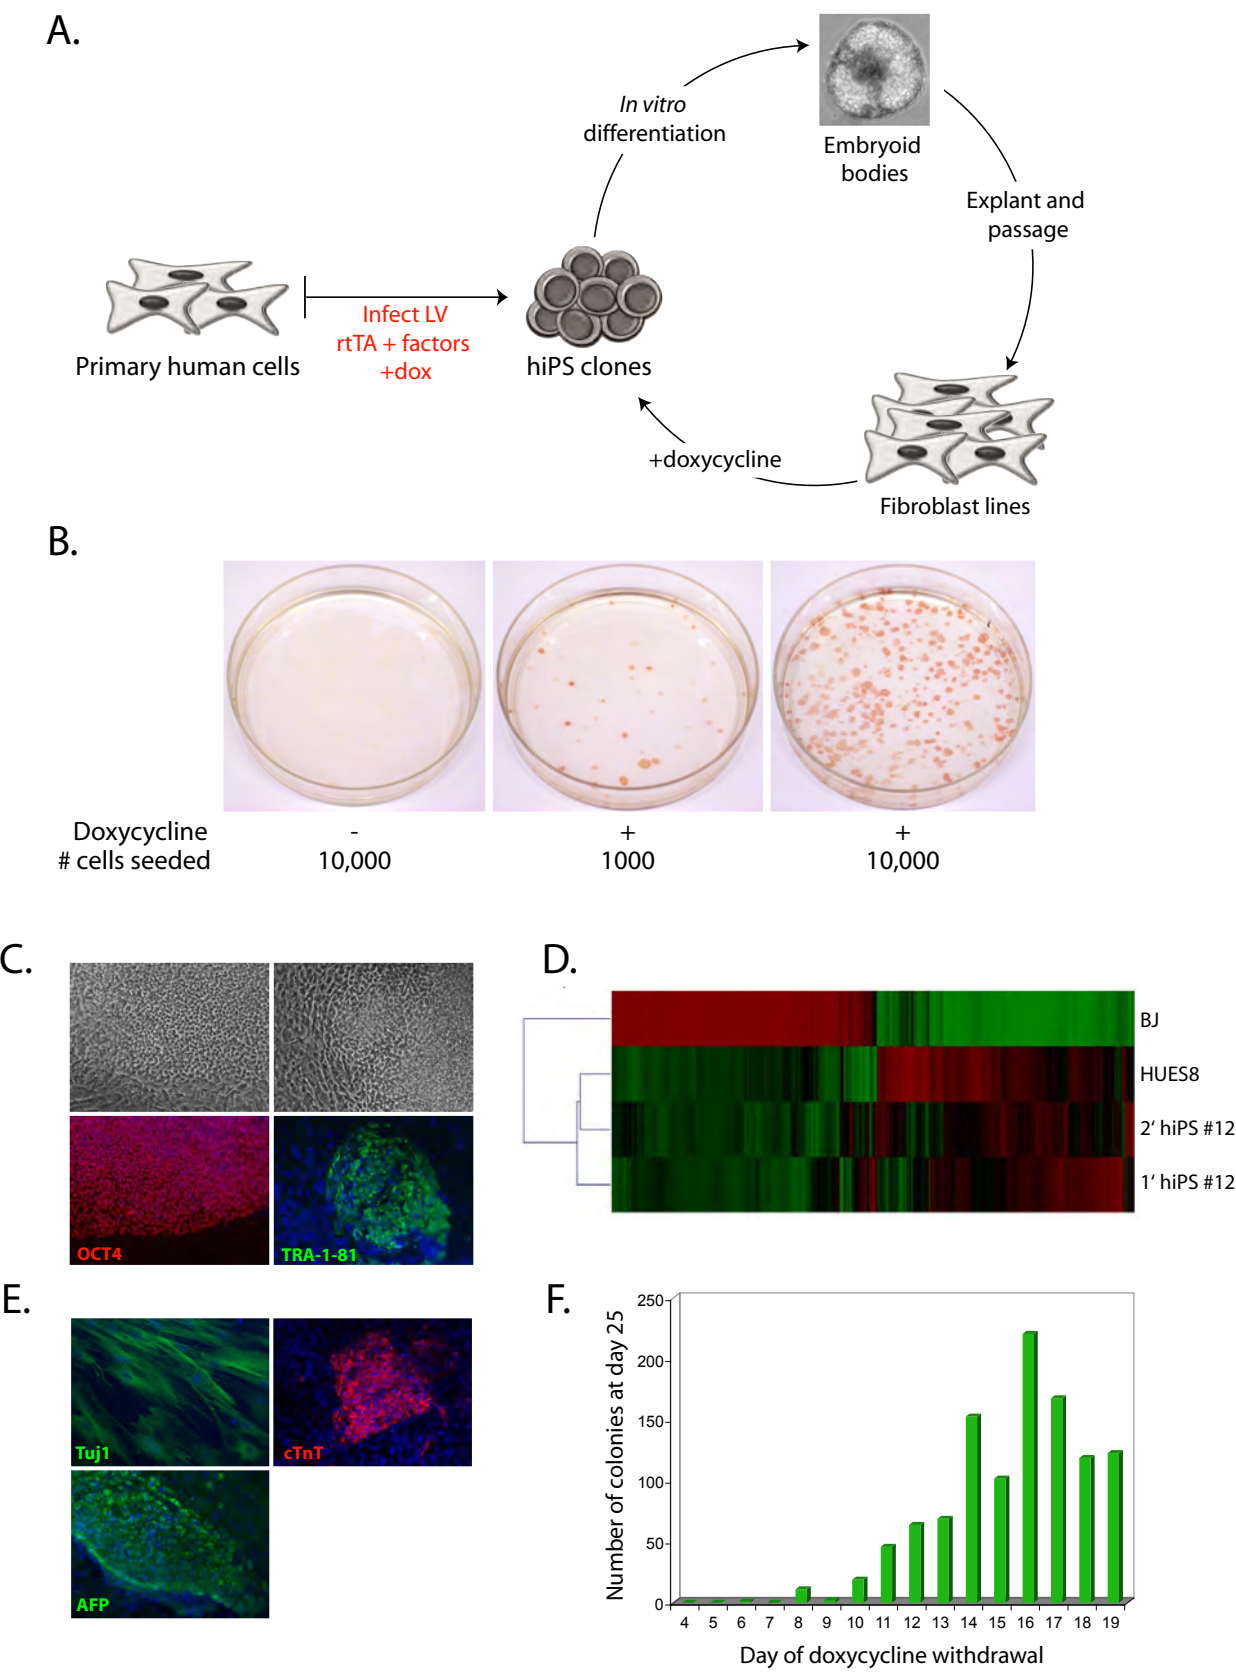

Supplementary Figure 1.

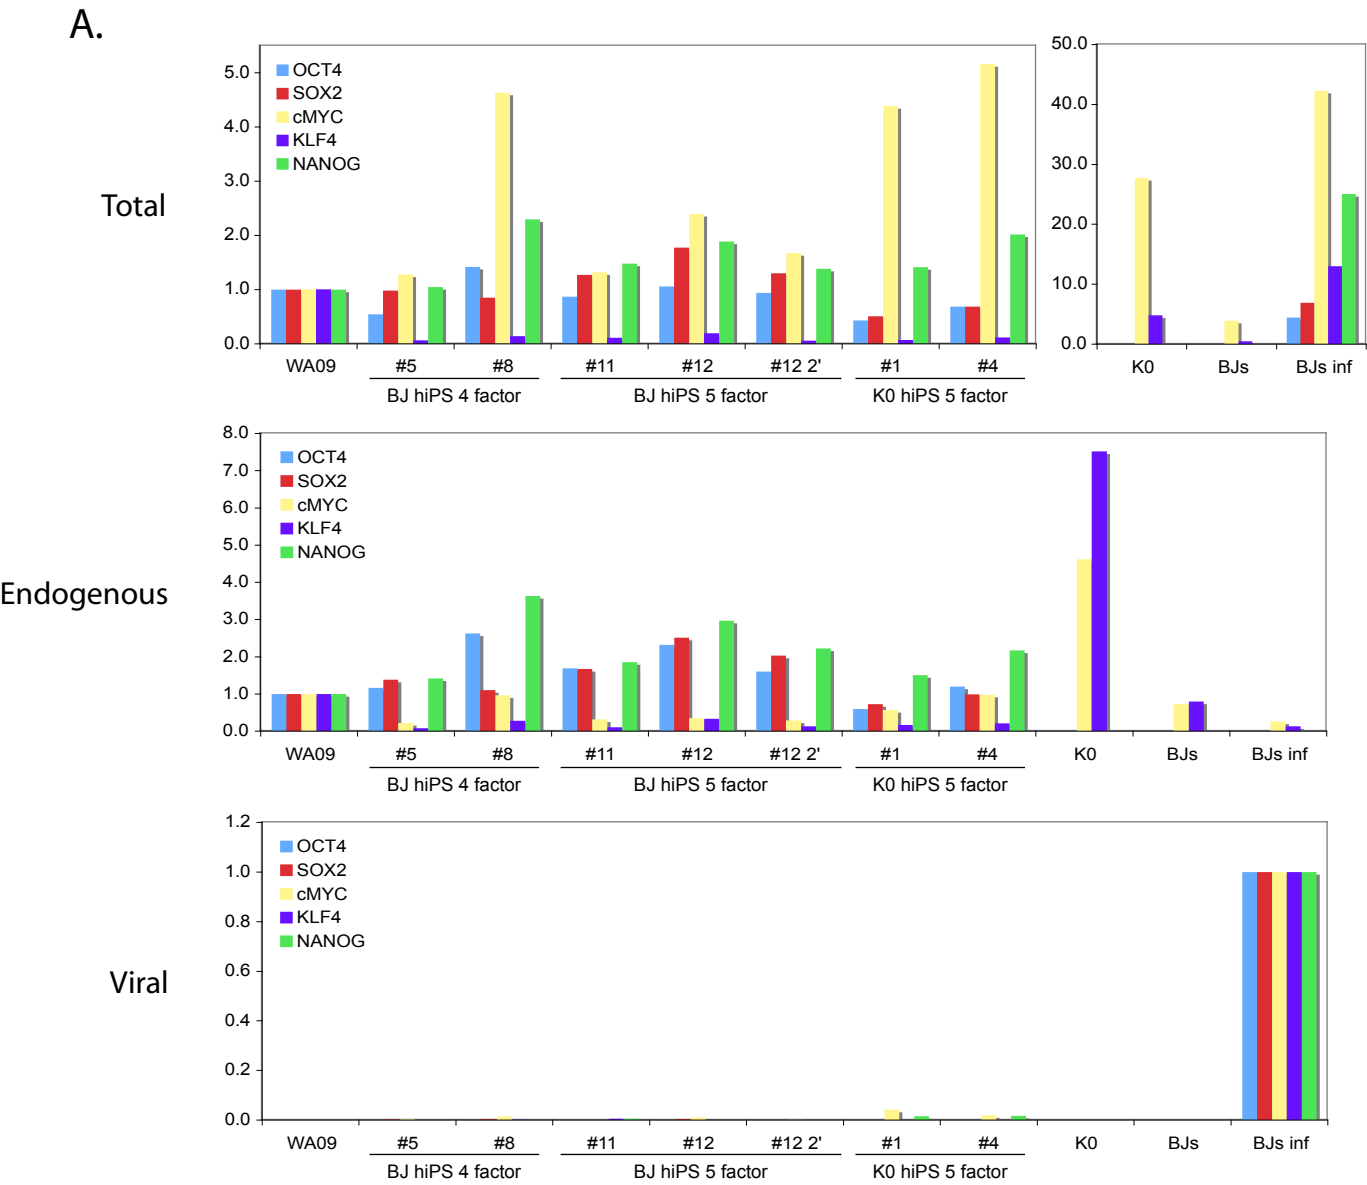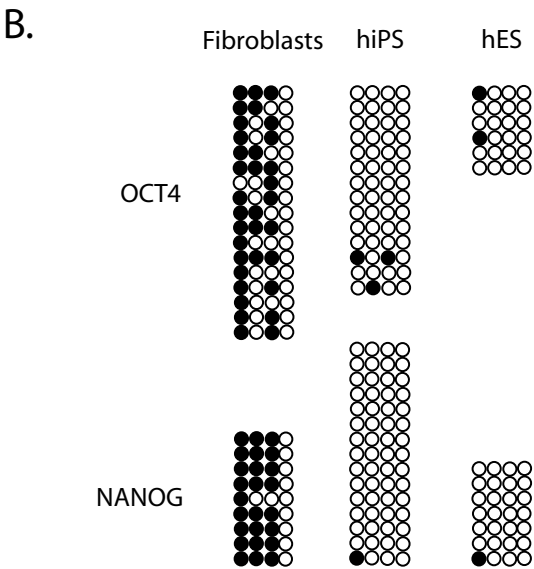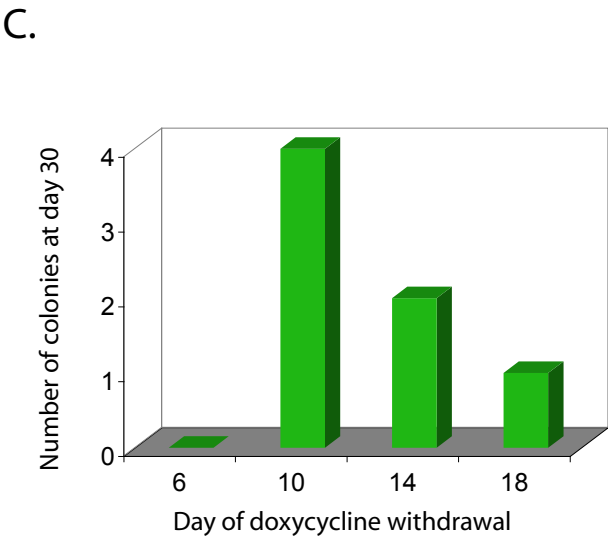

Supplementary Figure 2.

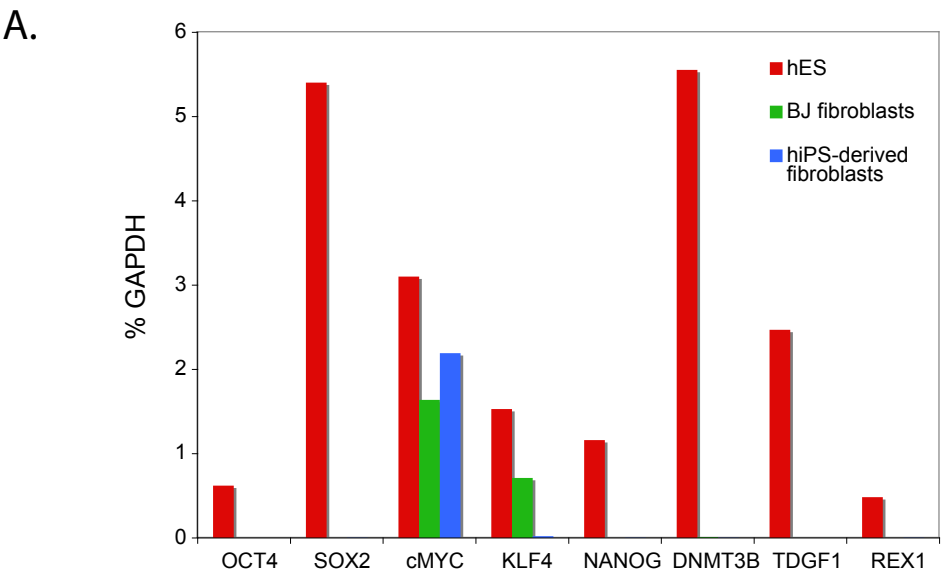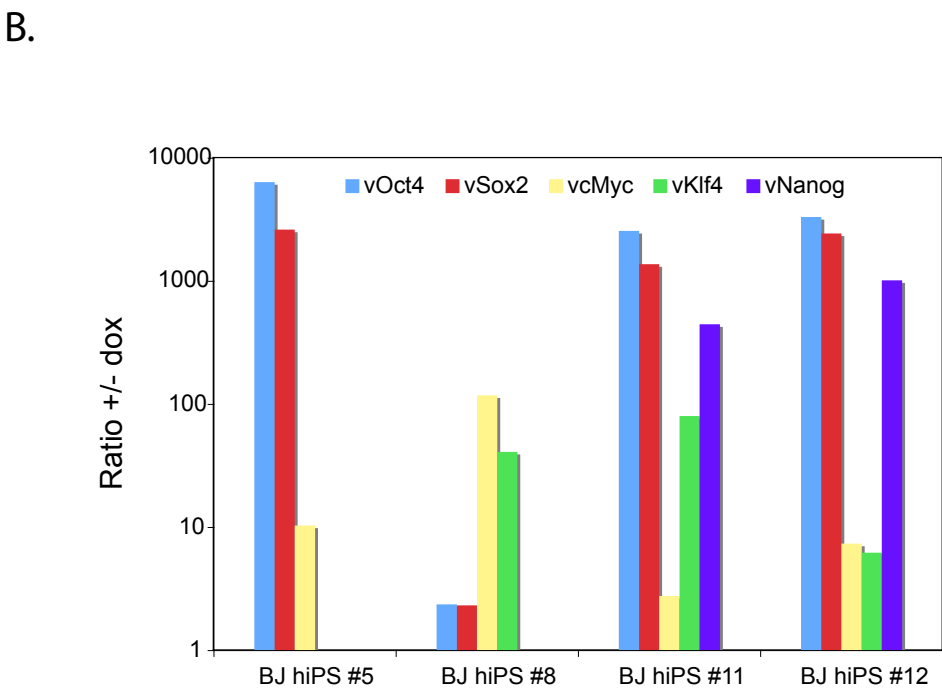

Supplementary Figure 3.

A. Day 10 dox withdrawal

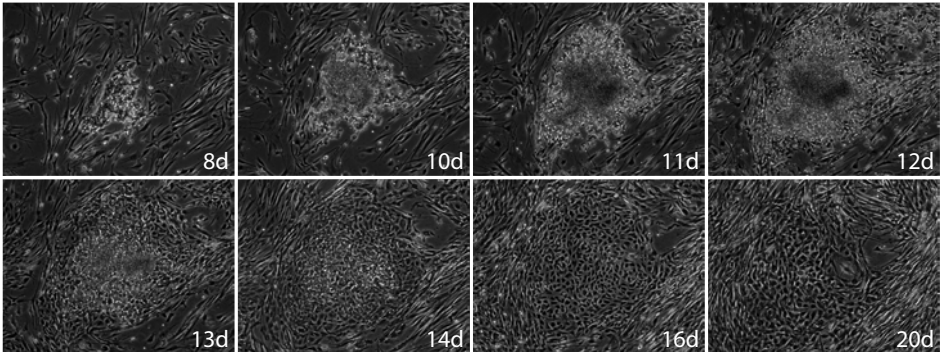

B. Day 14 dox withdrawal

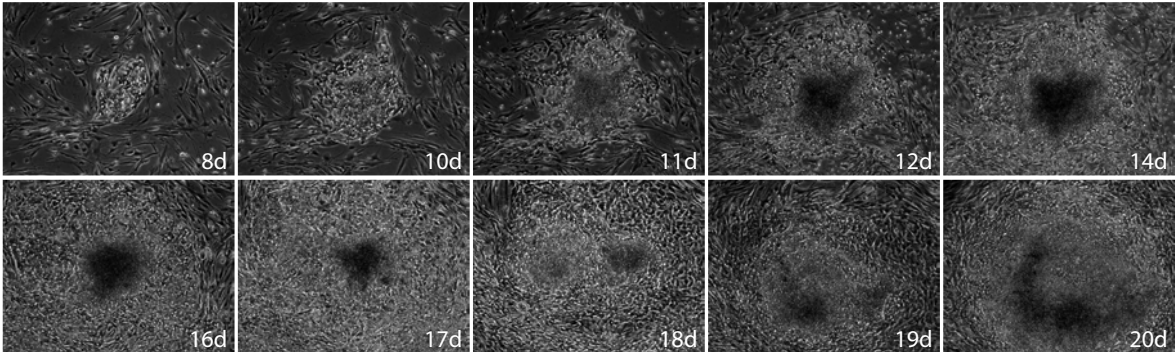

C. Day 9 dox withdrawal

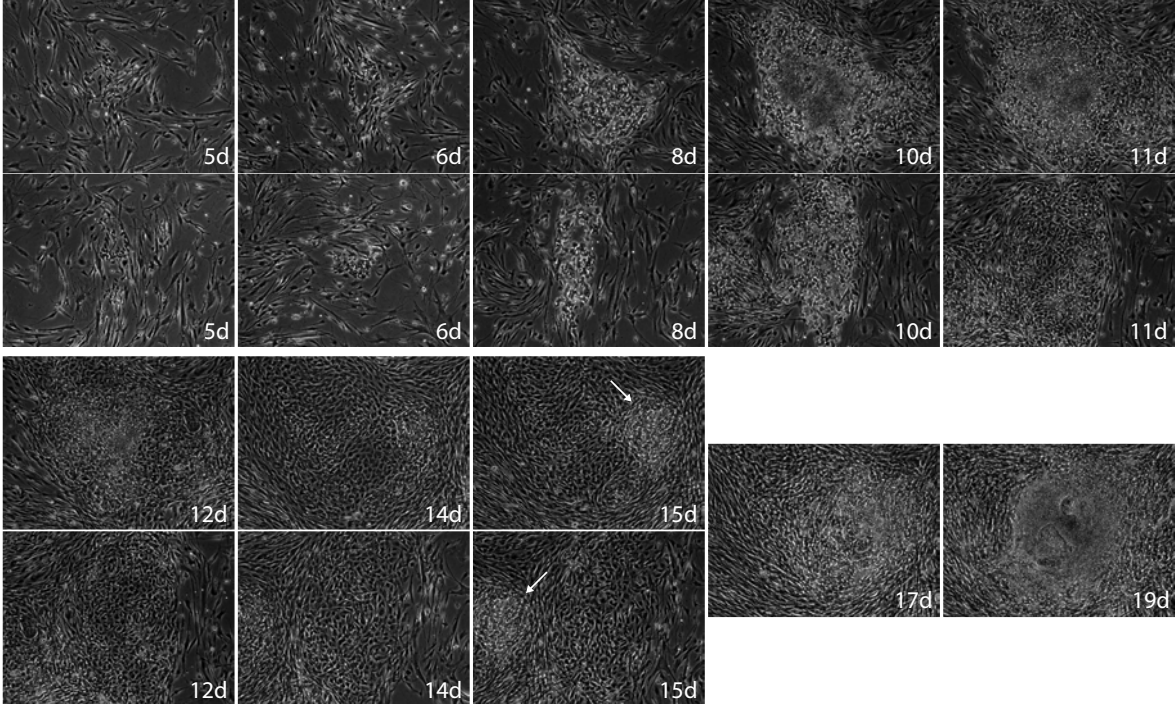

Supplementary Table 1. Summary of expanded hiPS cell lines.

| Parental cell                               | Factors     | Clones derived | Current passage<br>(July 2008) | Karyotype                                       |
|---------------------------------------------|-------------|----------------|--------------------------------|-------------------------------------------------|
| BJ fibroblasts (neonatal foreskin)          | 4 + GFP     | #5             | 30                             | 46, XY                                          |
|                                             |             | #6             | 20                             | 47,XY,+mar [2]<br>48,XY,+5,+13 [1]<br>46,XY[17] |
|                                             |             | #8             | 35                             | 46, XY                                          |
|                                             | 4 + NANOG   | #11            | 28                             | 46, XY                                          |
|                                             |             | #12            | 30                             | 46, XY                                          |
| BJ hiPS #12-derived fibroblast-like cells   | (4 + NANOG) | #12 secondary  | 20                             | 46, XY                                          |
| Epidermal keratinocytes (neonatal foreskin) | 4 + NANOG   | #1             | 7                              | ND                                              |
|                                             |             | #2             | 5                              | ND                                              |
|                                             |             | #4             | 6                              | ND                                              |

4 factors = OCT4, SOX2, cMYC, KLF4  
ND = not determined

Supplementary Table 2: Primers used in this study

| Gene name        | Forward primer sequence           | Reverse primer sequence         |
|------------------|-----------------------------------|---------------------------------|
| Total OCT4       | GAG GAG TCC CAG GAC ATC AA        | TGG CTG AAT ACC TTC CCA AA      |
| Total SOX2       | AGC TAC AGC ATG ATG CAG GA        | GGT CAT GGA GTT GTA CTG CA      |
| Total cMYC       | ACT CTG AGG AGG AAC AAG AA        | TGG AGA CGT GGC ACC TCT T       |
| Total KLF4       | CCC AAT TAC CCA TCC TTC CT        | ACG ATC GTC TTC CCC TCT TT      |
| Total NANOG      | TAC CTC AGC CTC CAG CAG AT        | CCT TCT GCG TCA CAC CAT T       |
| Lentiviral OCT4  | CCC CTG TCT CTG TCA CCA CT        | CCA CAT AGC GTA AAA GGA GCA     |
| Lentiviral SOX2  | ACA CTG CCC CTC TCA CAC AT        | CAT AGC GTA AAA GGA GCA ACA     |
| Lentiviral cMYC  | AAG AGG ACT TGT TGC GGA AA        | TTG TAA TCC AGA GGT TGA TTA TCG |
| Lentiviral KLF4  | GAC CAC CTC GCC TTA CAC AT        | CAT AGC GTA AAA GGA GCA ACA     |
| Lentiviral NANOG | ACA TGC AAC CTG AAG ACG TG        | CAC ATA GCG TAA AAG GAG CAA     |
| Endogenous OCT4  | TGT ACT CCT CGG TCC CTT TC        | TCC AGG TTT TCT TTC CCT AGC     |
| Endogenous SOX2  | GCT AGT CTC CAA GCG ACG AA        | GCA AGA AGC CTC TCC TTG AA      |
| Endogenous cMYC  | CGG AAC TCT TGT GCG TAA GG        | CTC AGC CAA GGT TGT GAG GT      |
| Endogenous KLF4  | TAT GAC CCA CAC TGC CAG AA        | TGG GAA CTT GAC CAT GAT TG      |
| Endogenous NANOG | CAG TCT GGA CAC TGG CTG AA        | CTC GCT GAT TAG GCT CCA AC      |
| OCT4 promoter    | AAG TTT TTG TGG GGG ATT TGT AT    | CCA CCC ACT AAC CTT AAC CTC TA  |
| NANOG promoter   | TTA ATT TAT TGG GAT TAT AGG GGT G | AAA CCT AAA AAC AAA CCC AAC AAC |
| DNMT3B           | CCA ATC CTG GAG GCT ATC CG        | ACT GGG GTG TCA GAG CCA T       |
| TDGF1 (CRIPTO)   | AAG ATG GCC CGC TTC TCT TAC       | AGA TGG ACG AGC AAA TTC CTG     |
| ZFP42 (REX1)     | AAC GGG CAA AGA CAA GAC AC        | GCT GAC AGG TTC TAT TTC CGC     |
| GAPDH            | TGT TGC CAT CAA TGA CCC CTT       | CTC CAC GAC GTA CTC AGC G       |
